# Supplementary material for: Smart salt-responsive thread for highly sensitive microfluidic glucose detection in sweat
Source: Royal Society of Chemistry journal article supplement (doi:10.1039/d3lc00975k), 2023-12-28
Supplement: d3lc00975k3.pdf [file d3lc00975k3.pdf]

*Supporting Information*

---

**Smart salt-responsive thread for highly sensitive  
microfluidic glucose detection in sweat**

Liang Wu,<sup>ab</sup> Jing Xiong,<sup>ab</sup> Gang Xiao,<sup>ab</sup> Jun Ju,<sup>ab</sup> Wei Sun,<sup>c</sup> Wei Wang,<sup>d</sup> Yan Ma,<sup>e</sup> Ruilong Ran,<sup>e</sup>  
Yan Qiao,<sup>ab</sup> Changming Li,<sup>f</sup> Ling Yu<sup>\*ab</sup> and Zhisong Lu<sup>\*ab</sup>

<sup>a</sup> Key Laboratory of Luminescence Analysis and Molecular Sensing, Ministry of Education,  
School of Materials & Energy, Southwest University, Chongqing 400715, P. R. China

<sup>b</sup> Institute for Clean Energy & Advanced Materials, School of Materials & Energy, Southwest  
University, Chongqing 400715, P. R. China

<sup>c</sup> Key Laboratory of Laser Technology and Optoelectronic Functional Materials of Hainan  
Province, College of Chemistry and Chemical Engineering, Hainan Normal University, Haikou  
571158, P. R. China

<sup>d</sup> Singapore Institute of Manufacturing Technology, Singapore 138669, Singapore

<sup>e</sup> College of Sericulture, Textile and Biomass Sciences, Southwest University, Chongqing  
400715, P. R. China

<sup>f</sup> School of Materials Science and Engineering, Suzhou University of Science and Technology,  
Suzhou 215011, P. R. China.

\*Corresponding authors: E-mail: zslu@swu.edu.cn (Z. S. Lu) or lingyu12@swu.edu.cn (L. Yu); Tel.: +86-  
23-68254732; Fax: +86-23-68254969.

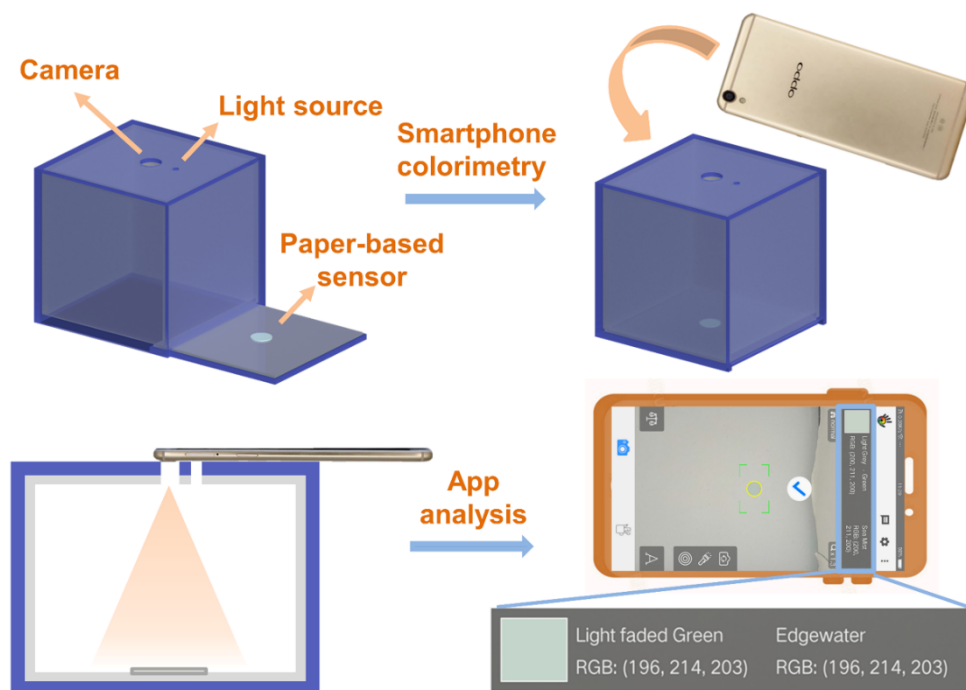

Figure S1. Smartphone-based data collecting system.

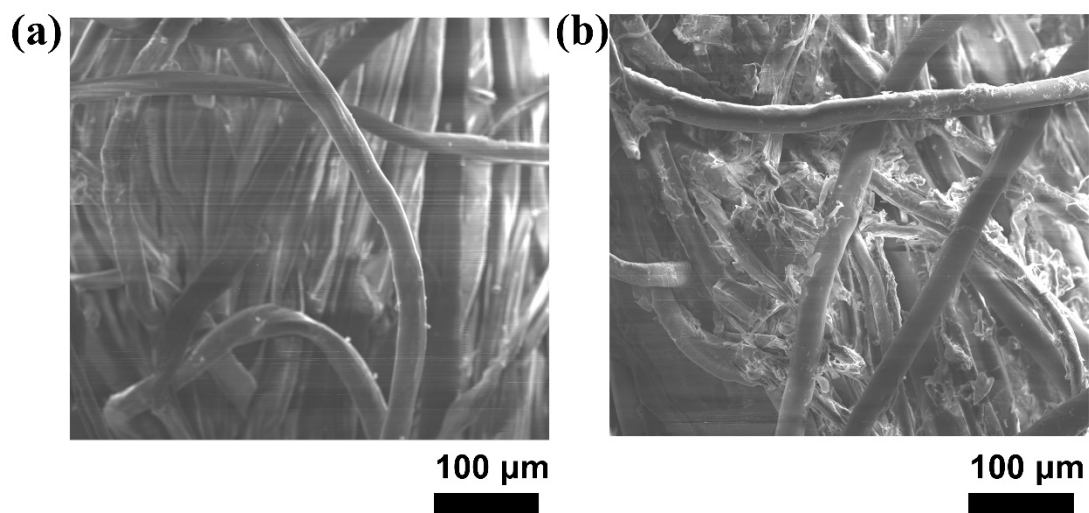

Figure S2. SEM images of the pristine (a) and PSBMA-modified (b) cotton threads.

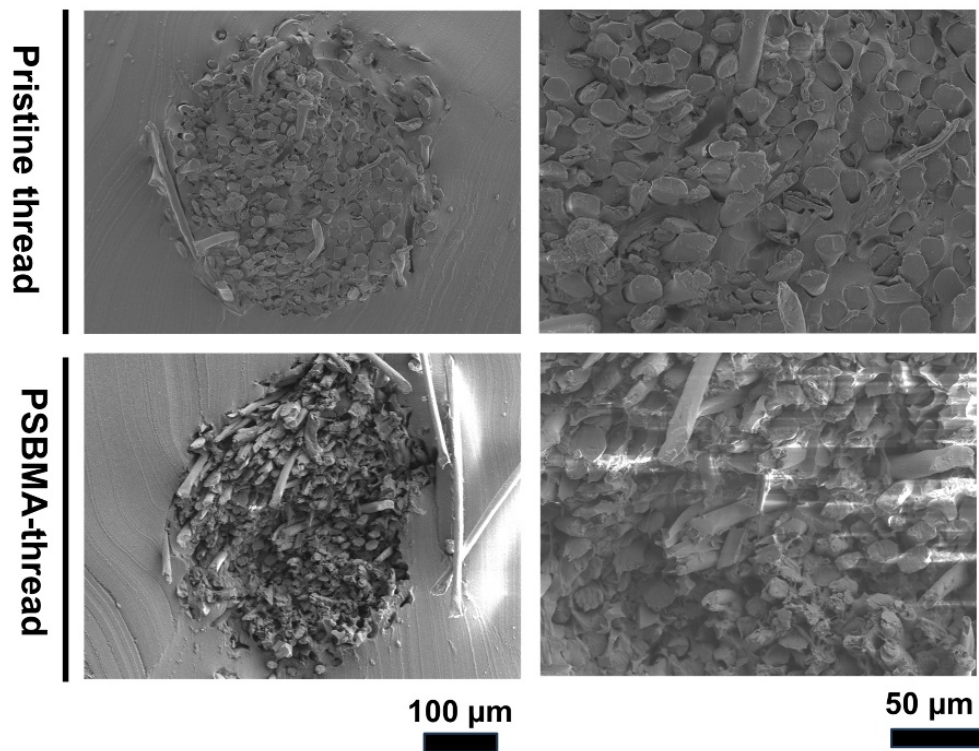

Figure S3. Cross-sectional SEM images of the pristine thread and PSBMA-thread.

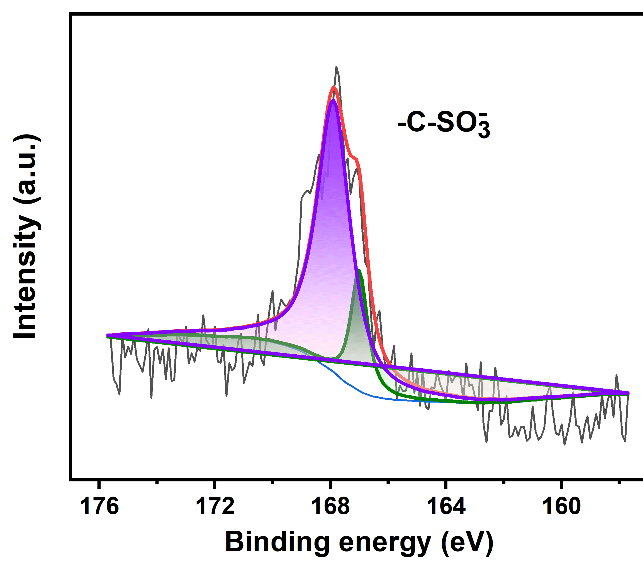

Figure S4. XPS S2p spectra of PSBMA-thread.

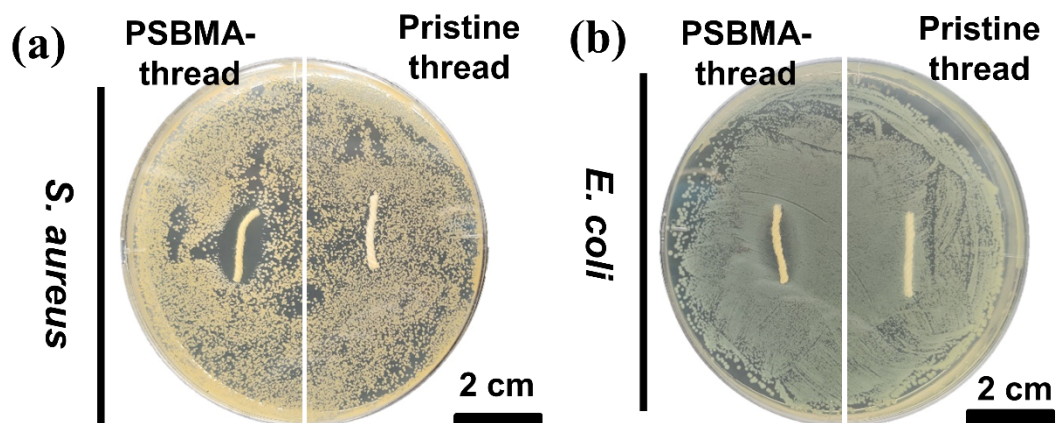

Figure S5. Antibacterial effects of pristine cotton thread and PSBMA-modified thread.

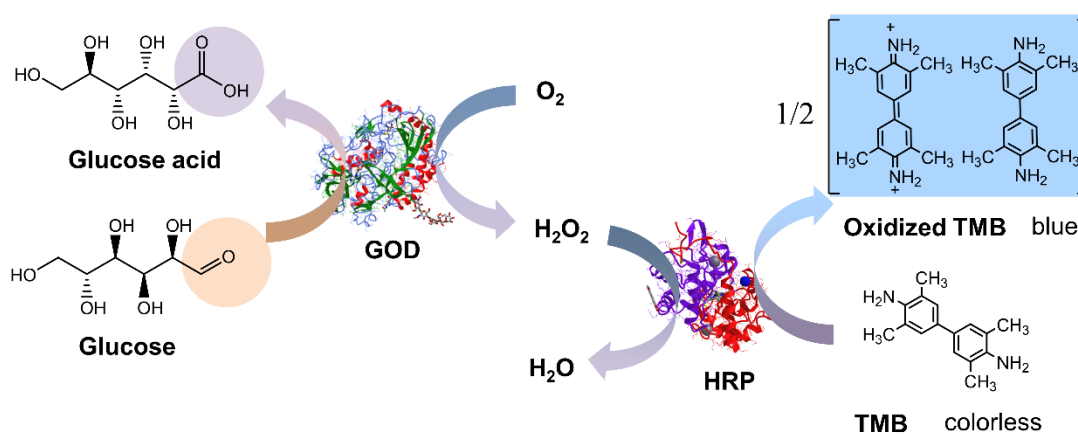

Figure S6. Working principle of the GOD/HRP/TMB-based colorimetric sensors.

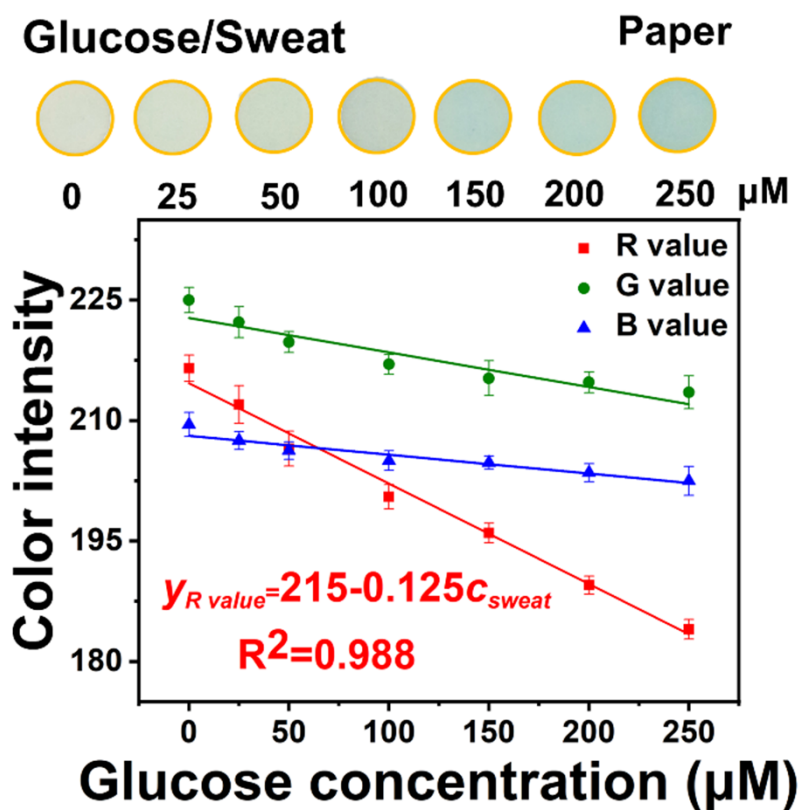

Figure S7. Performance of the paper-based colorimetric glucose sensor.

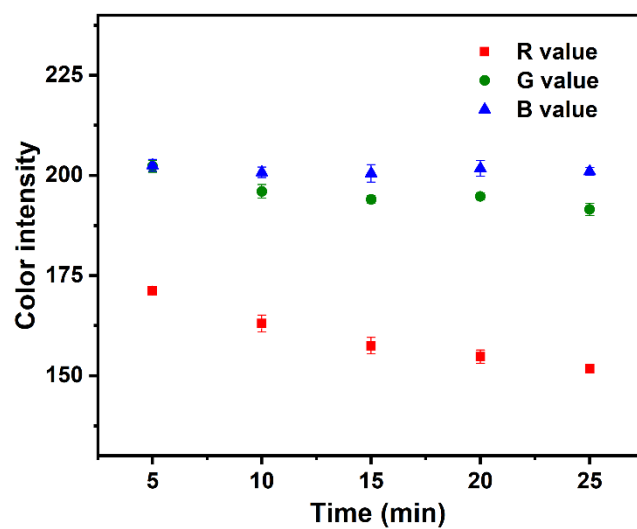

Figure S8. Effects of the reaction duration on the color intensity of the paper-based sensors.

## Supporting Information

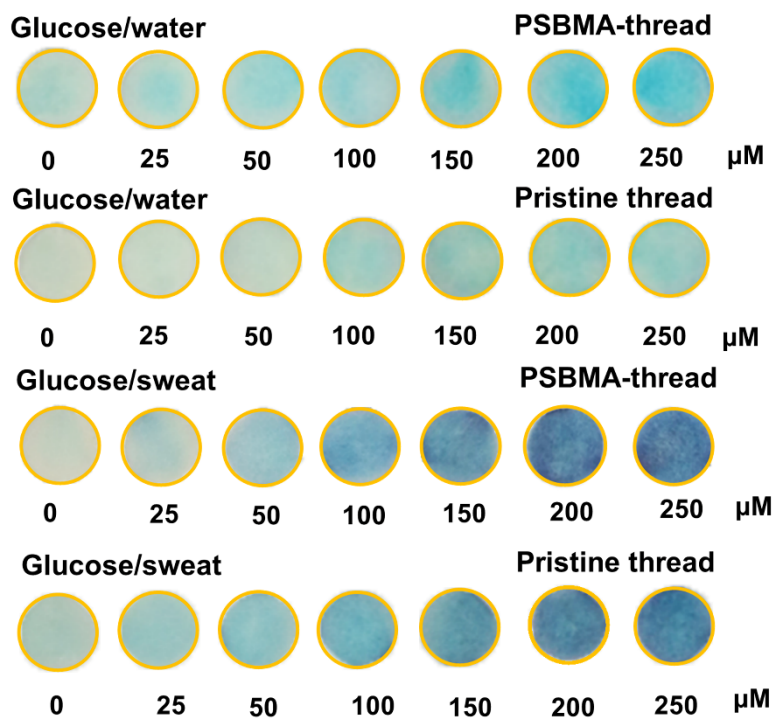

Figure S9. Photos of the corresponding paper sensing units after glucose sensing.

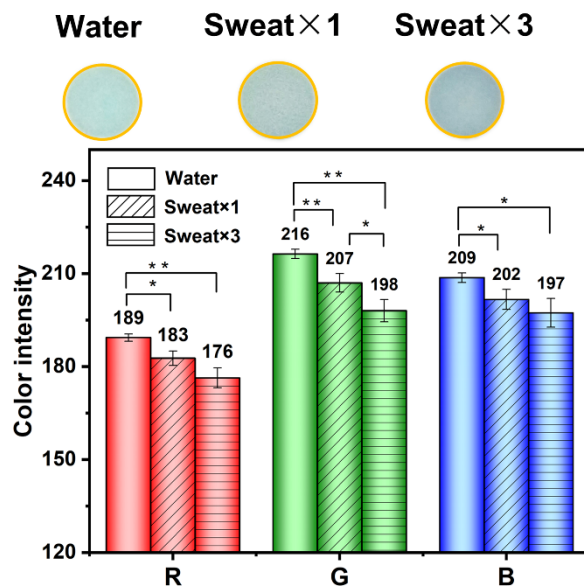

Figure S10. Effects of the ionic strength on the color intensity of the paper-based sensors.

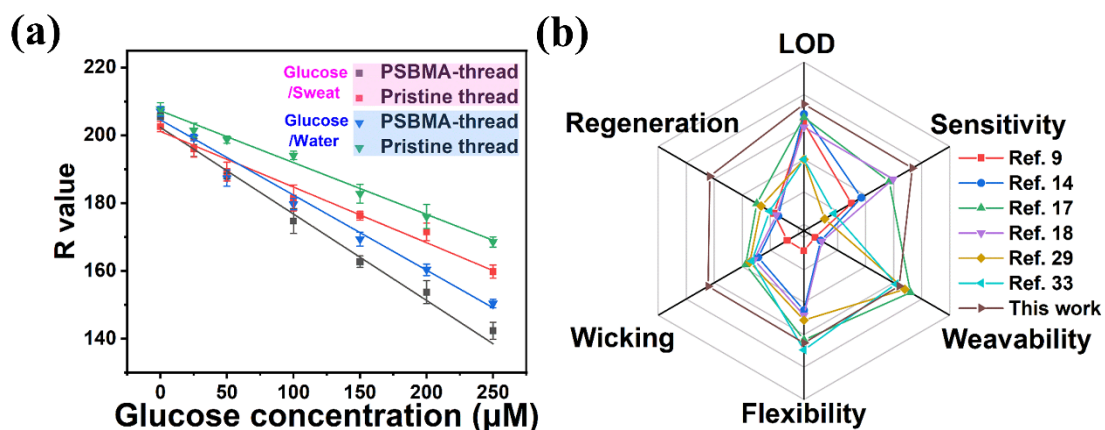

**Figure S11.** Performance of the microfluidic thread/paper-based glucose sensing systems in different solutions (a). A comparison of the performance of glucose sensors for body fluid (b).

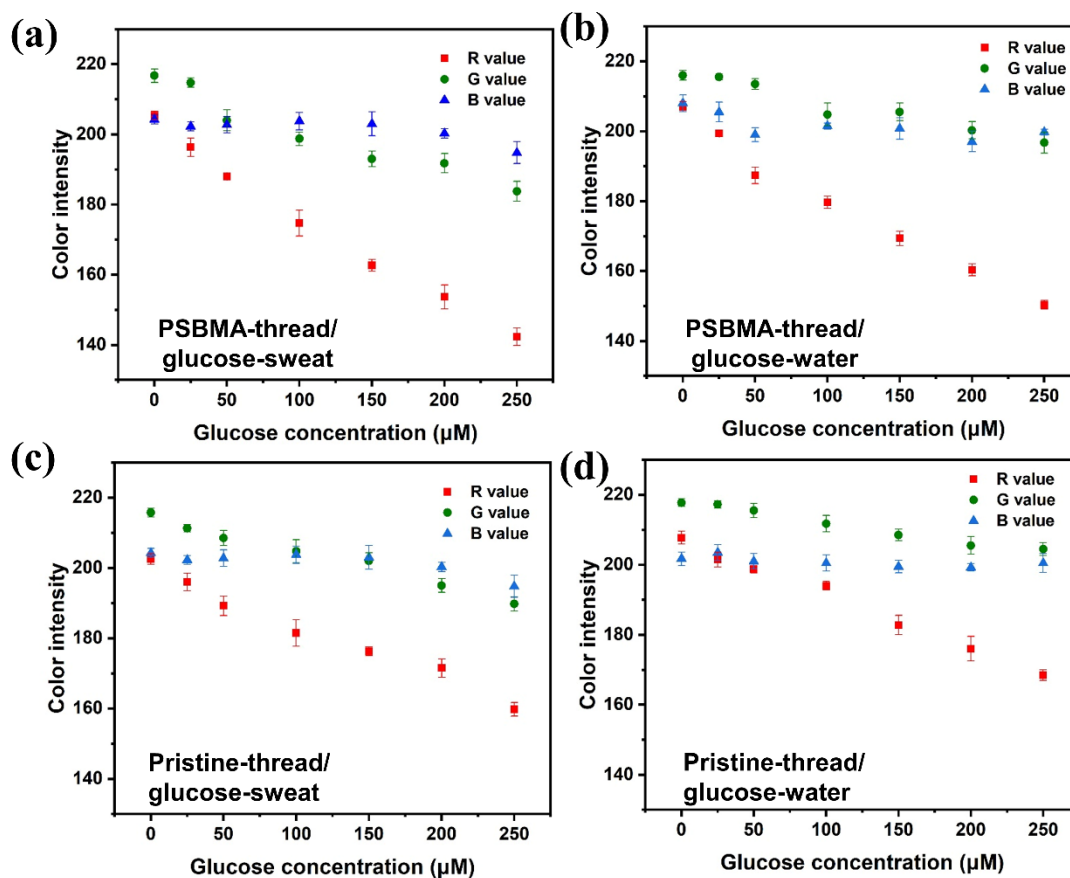

**Figure S12.** Color intensity against glucose concentration in terms of the R-, G-, and B-value.

## *Supporting Information*

**Table S1.** Parameters for the calibration curves.

|                                 | <b>PSBMA-<br/>thread/glucose-<br/>water</b> | <b>Pristine-<br/>thread/glucose-<br/>water</b> | <b>PSBMA-<br/>thread/glucose-<br/>sweat</b> | <b>Pristine-<br/>thread/glucose-<br/>sweat</b> |
|---------------------------------|---------------------------------------------|------------------------------------------------|---------------------------------------------|------------------------------------------------|
| Intercept                       | 205                                         | 207                                            | 202                                         | 201                                            |
| Adj. R-Square                   | 0.981                                       | 0.984                                          | 0.989                                       | 0.986                                          |
| LOD/ $\mu\text{M}$              | 19.1                                        | 35.1                                           | 14.7                                        | 27.4                                           |
| Sensitivity/ $\mu\text{M}^{-1}$ | -0.222                                      | -0.153                                         | -0.255                                      | -0.164                                         |

**Table S2.** Recovery ratio of the thread-based microfluidic sensors.

| <b>Thread</b>              | <b>Spiked<br/>concentration/<math>\mu\text{M}</math><br/>(glucose)</b> | <b><math>\mu\text{TPAD}</math> assay<br/>(<math>\mu\text{M}</math>)(mean <math>\pm</math><br/>SD, n=3)</b> | <b>Recovery/%<br/>(mean <math>\pm</math> SD,<br/>n=3)</b> | <b>Coefficient of<br/>variation/% (CV)</b> |
|----------------------------|------------------------------------------------------------------------|------------------------------------------------------------------------------------------------------------|-----------------------------------------------------------|--------------------------------------------|
|                            | <b>50</b>                                                              | <b>48.7<math>\pm</math>0.4</b>                                                                             | <b>97.4<math>\pm</math>0.7</b>                            | <b>0.8</b>                                 |
| <b>PSBMA-<br/>thread</b>   | <b>150</b>                                                             | <b>150.3<math>\pm</math>1.5</b>                                                                            | <b>100.2<math>\pm</math>1.0</b>                           | <b>1.0</b>                                 |
|                            | <b>250</b>                                                             | <b>247.8<math>\pm</math>1.8</b>                                                                            | <b>99.1<math>\pm</math>0.7</b>                            | <b>0.7</b>                                 |
|                            | <b>50</b>                                                              | <b>49.5<math>\pm</math>0.6</b>                                                                             | <b>99.0<math>\pm</math>1.1</b>                            | <b>1.1</b>                                 |
| <b>Pristine<br/>thread</b> | <b>150</b>                                                             | <b>148.4<math>\pm</math>1.2</b>                                                                            | <b>98.9<math>\pm</math>0.8</b>                            | <b>0.8</b>                                 |
|                            | <b>250</b>                                                             | <b>246.3<math>\pm</math>1.5</b>                                                                            | <b>98.5<math>\pm</math>0.6</b>                            | <b>0.6</b>                                 |



## Supporting Information

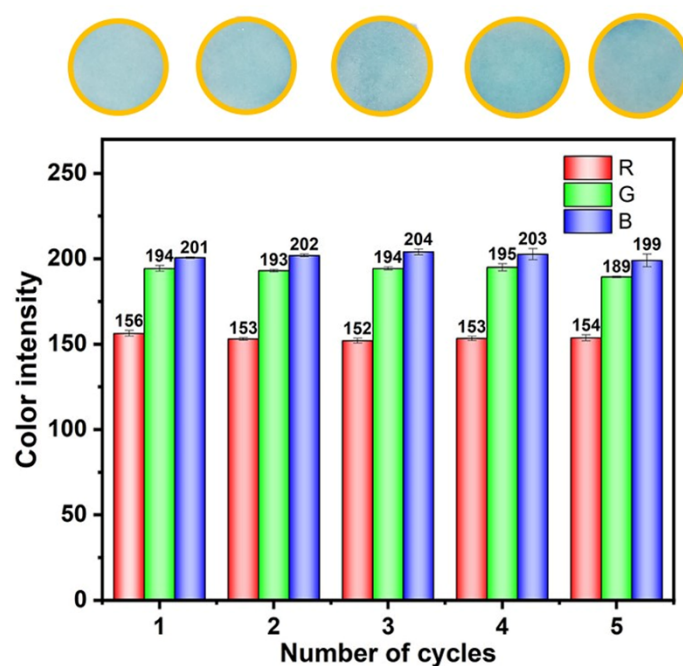

**Figure S13.** Regeneration of the PBMSA-modified threads in the microfluidic system.

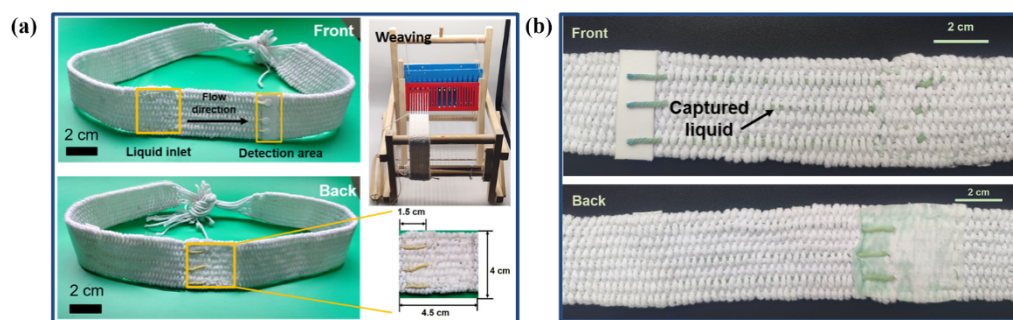

**Figure S14.** (a) Preparation of the glucose sensing headband; (b) Photos of the headband worn on the forehead during exercise.

## *Supporting Information*

**Table S3.** Summary of glucose colorimetric sensors in body-fluid analysis

| Materials and Substrate                    | Enzyme and chromogenic reagent | LOD                | Detection range | Sensitivity                         | Test sample | Reference |
|--------------------------------------------|--------------------------------|--------------------|-----------------|-------------------------------------|-------------|-----------|
| PDMS                                       | GOD/HRP/o-dianisidine          | 30 $\mu\text{M}$   | 0.1–0.5 mM      | 111.23 $\text{mM}^{-1}$             | Sweat       | 1         |
| PDMS                                       | GOD/AuNCs/ODA                  | 21 $\mu\text{M}$   | 0.05–1.6 mM     | 0.469 $\text{dec}(\text{mM})^{-1}$  | Sweat       | 2         |
| BC/CMC hydrogel                            | GOD/HRP/KI                     | 25 $\mu\text{M}$   | 0.025–0.5 mM    | Not given                           | Sweat       | 3         |
| PVA/sucrose hydrogel                       | GOD/HRP/4-aminoantipyrine      | Not given          | 0–2 mM          | Not given                           | Sweat       | 4         |
| $\text{TiO}_2$ nanotubes/alginate hydrogel | GOD/HRP/TMB                    | 44 $\mu\text{M}$   | 0.1–0.8 mM      | 83.678 $\text{mM}^{-1}$             | Sweat       | 5         |
| Cotton cloth                               | GOD/HRP/TMB                    | 1700 $\mu\text{M}$ | 3.0–15.0 mM     | 53.963 $\text{dec}(\text{mM})^{-1}$ | Serum       | 6         |
| Filter paper                               | GOD/HRP/TBHBA/4-AAP            | 300 $\mu\text{M}$  | 1.0–11.0 mM     | 0.5238 $\text{mM}^{-1}$             | Serum       | 7         |
| Filter paper                               | GOD/HRP/TMB                    | 14 $\mu\text{M}$   | 0.02–4.0 mM     | 108.06 $\text{dec}(\text{mM})^{-1}$ | Serum /Tear | 8         |
| Filter paper                               | GOD/HRP/4-AAP/DHBS             | 50 $\mu\text{M}$   | 0.05–0.3 mM     | 200.9 $\text{mM}^{-1}$              | Sweat       | 9         |
| Cotton thread                              | GOD/HRP/KI                     | 100 $\mu\text{M}$  | 0.1–5.0 mM      | 8.28 $\text{mM}^{-1}$               | Tear        | 10        |
| Cotton thread                              | GOD/HRP/KI                     | 100 $\mu\text{M}$  | 0.1–3 mM        | 34.455 $\text{mM}^{-1}$             | Sweat       | 11        |
| Cotton thread/paper                        | GOD/HRP/TMB                    | 35 $\mu\text{M}$   | 0.05–0.25 mM    | 190 $\text{mM}^{-1}$                | Sweat       | 12        |
| PSBMA thread/paper                         | GOD/HRP/TMB                    | 14.7 $\mu\text{M}$ | 0.025–0.25 mM   | 255 $\text{mM}^{-1}$                | Sweat       | This work |

### Reference

1. J. Xiao, Y. Liu, L. Su, D. Zhao, L. Zhao and X. Zhang, *Anal. Chem.*, 2019, **91**, 14803-14807.
2. X. Mei, J. Yang, J. Liu and Y. Li, *Chem. Eng. J.*, 2023, **454**, 140248.
3. T. Siripongpreda, B. Somchob, N. Rodthongkum and V. P. Hoven, *Carbohydr. Polym.*, 2021, **256**, 117506.
4. L. Wang, T. Xu, X. He and X. Zhang, *J. Mater. Chem. C*, 2021, **9**, 14938-14945.
5. U. B. Gunatilake, S. Garcia-Rey, E. Ojeda, L. Basabe-Desmonts and F. Benito-Lopez, *ACS Appl. Mater. Interfaces*, 2021, **13**, 37734-37745.
6. B. Tasaengtong and Y. Sameenoi, *Microchem. J.*, 2020, **158**, 105078.
7. W. J. Zhu, D. Q. Feng, M. Chen, Z. D. Chen, R. Zhu, H. L. Fang and W. Wang, *Sens. Actuators, B*, 2014, **190**, 414-418.
8. X. Wang, F. Li, Z. Cai, K. Liu, J. Li, B. Zhang and J. He, *Anal. Bioanal. Chem.*, 2018, **410**, 2647-2655.
9. Z. Zhang, M. Azizi, M. Lee, P. Davidowsky, P. Lawrence and A. Abbaspourrad, *Lab Chip*, 2019, **19**, 3448-3460.
10. P. Punnoy, P. Preechakasedkit, C. Aumnate, N. Rodthongkum, P. Potiyaraj and N. Ruecha, *Mater. Lett*, 2021, **299**, 130076.
11. N. Promphet, J. P. Hinestroza, P. Rattanawaleedirojn, N. Soatthiyanon, K. Siralermukul, P. Potiyaraj and N. Rodthongkum, *Sens. Actuators, B*, 2020, **321**, 128549.
12. G. Xiao, J. He, X. Chen, Y. Qiao, F. Wang, Q. Xia, L. Yu and Z. Lu, *Cellulose*, 2019, **26**, 4553-4562.
